# Supplementary material for: Comparative Analysis of Antibiotic Resistance and Biofilm Characteristics of Two Major Enterococcus Species from Poultry Slaughterhouses in South Korea
Source: MDPI journal article supplement (doi:10.3390/vetsci11040180), 2024-04-16
Supplement: s1 [file s1]

**Supplementary Table S1.** Antibiotic resistance patterns

| Antibiotic resistance patterns    | No. of <i>E. faecalis</i> (%) | No. of <i>E. faecium</i> (%) |
|-----------------------------------|-------------------------------|------------------------------|
| Pan-susceptible                   | 0 (0)                         | 1 (2.08)                     |
| CIP                               | 0 (0)                         | 1 (2.08)                     |
| ERY                               | 0 (0)                         | 1 (2.08)                     |
| LZD                               | 0 (0)                         | 1 (2.08)                     |
| Q/D                               | 5 (10.42)                     | 1 (2.08)                     |
| ERY, Q/D                          | 4 (8.33)                      | 0 (0)                        |
| ERY, RIF                          | 0 (0)                         | 4 (8.33)                     |
| MIN, PEN                          | 0 (0)                         | 1 (2.08)                     |
| Q/D, RIF                          | 6 (12.5)                      | 0 (0)                        |
| AMP, CIP, PEN                     | 0 (0)                         | 2 (4.17)                     |
| AMP, PEN, RIF                     | 0 (0)                         | 1 (2.08)                     |
| CIP, DOX, Q/D                     | 1 (2.08)                      | 0 (0)                        |
| CIP, ERY, LZD                     | 0 (0)                         | 1 (2.08)                     |
| CIP, ERY, Q/D                     | 1 (2.08)                      | 0 (0)                        |
| CIP, Q/D, RIF                     | 0 (0)                         | 2 (4.17)                     |
| DOX, ERY, LZD                     | 1 (2.08)                      | 0 (0)                        |
| DOX, ERY, Q/D                     | 1 (2.08)                      | 0 (0)                        |
| DOX, LZD, Q/D                     | 1 (2.08)                      | 0 (0)                        |
| ERY, LZD, PEN                     | 0 (0)                         | 1 (2.08)                     |
| ERY, MIN, Q/D                     | 4 (8.33)                      | 0 (0)                        |
| ERY, PEN, Q/D                     | 1 (2.08)                      | 0 (0)                        |
| ERY, Q/D, RIF                     | 4 (8.33)                      | 2 (4.17)                     |
| LZD, MIN, Q/D                     | 0 (0)                         | 1 (2.08)                     |
| CIP, ERY, LZD, Q/D                | 0 (0)                         | 2 (4.17)                     |
| CIP, ERY, LZD, RIF                | 0 (0)                         | 1 (2.08)                     |
| CIP, ERY, MIN, Q/D                | 9 (18.75)                     | 0 (0)                        |
| CIP, MIN, Q/D, RIF                | 1 (2.08)                      | 0 (0)                        |
| DOX, ERY, MIN, PEN                | 0 (0)                         | 1 (2.08)                     |
| DOX, ERY, MIN, Q/D                | 0 (0)                         | 4 (8.33)                     |
| DOX, ERY, Q/D, RIF                | 1 (2.08)                      | 0 (0)                        |
| DOX, LZD, MIN, Q/D                | 0 (0)                         | 1 (2.08)                     |
| ERY, LZD, Q/D, RIF                | 0 (0)                         | 7 (14.58)                    |
| LZD, MIN, Q/D, RIF                | 0 (0)                         | 1 (2.08)                     |
| AMP, CIP, ERY, LZD, PEN           | 0 (0)                         | 1 (2.08)                     |
| AMP, DOX, PEN, Q/D, RIF           | 1 (2.08)                      | 0 (0)                        |
| AMP, ERY, MIN, Q/D, RIF           | 1 (2.08)                      | 0 (0)                        |
| CIP, DOX, ERY, MIN, Q/D           | 2 (4.17)                      | 1 (2.08)                     |
| CIP, DOX, ERY, Q/D, RIF           | 1 (2.08)                      | 0 (0)                        |
| CIP, DOX, LZD, MIN, RIF           | 0 (0)                         | 1 (2.08)                     |
| CIP, ERY, MIN, PEN, Q/D           | 1 (2.08)                      | 0 (0)                        |
| CIP, ERY, MIN, Q/D, RIF           | 1 (2.08)                      | 0 (0)                        |
| CIP, LZD, MIN, Q/D, RIF           | 0 (0)                         | 1 (2.08)                     |
| DOX, ERY, LZD, MIN, Q/D           | 0 (0)                         | 1 (2.08)                     |
| DOX, ERY, LZD, MIN, RIF           | 0 (0)                         | 1 (2.08)                     |
| AMP, CIP, DOX, LZD, MIN, PEN      | 0 (0)                         | 1 (2.08)                     |
| CIP, DOX, ERY, LZD, MIN, PEN      | 0 (0)                         | 1 (2.08)                     |
| CIP, DOX, ERY, LZD, MIN, Q/D      | 0 (0)                         | 1 (2.08)                     |
| CIP, DOX, LZD, MIN, Q/D, RIF      | 0 (0)                         | 1 (2.08)                     |
| DOX, ERY, LZD, MIN, Q/D, RIF      | 0 (0)                         | 1 (2.08)                     |
| AMP, CIP, DOX, ERY, MIN, PEN, Q/D | 1 (2.08)                      | 0 (0)                        |

Ampicillin (AMP), ciprofloxacin (CIP), doxycycline (DOX), erythromycin (ERY), linezolid (LZD), minocycline (MIN), penicillin (PEN), quinupristin/dalfopristin (Q/D), rifampicin (RIF), and vancomycin (VAN)

**Supplementary Table S2.** Result of biofilm assay, biofilm-associated gene screening, and AST for 48 isolates of *E. faecalis*

| Species              | Biofilm |          |      | Genes |     |      |      |     |     | Antimicrobial Susceptibility Test (AST) |      |      |      |      |      |      |      |      |     |      |     |  | MAR index |
|----------------------|---------|----------|------|-------|-----|------|------|-----|-----|-----------------------------------------|------|------|------|------|------|------|------|------|-----|------|-----|--|-----------|
|                      | O. D    | Quantity | agg  | efaA  | bop | srt  | sprE | cob | ccf | AMP                                     | CIP  | DOX  | ERY  | LZD  | MIN  | PEN  | Q/D  | RIF  | VAN | MDR  |     |  |           |
| E. faecalis          | 1.01    | S        | +    | -     | +   | +    | +    | +   | +   | S                                       | I    | I    | S    | S    | I    | S    | R    | R    | S   | +    | 0.2 |  |           |
|                      | 0.95    | S        | +    | -     | +   | +    | +    | +   | +   | R                                       | S    | I    | R    | S    | R    | S    | R    | R    | S   | +    | 0.5 |  |           |
|                      | 1.02    | S        | +    | -     | +   | +    | +    | +   | +   | S                                       | S    | I    | R    | S    | I    | S    | R    | R    | S   | +    | 0.3 |  |           |
|                      | 1       | S        | +    | -     | +   | +    | +    | +   | +   | S                                       | I    | I    | R    | S    | I    | S    | R    | R    | S   | +    | 0.3 |  |           |
|                      | 0.93    | S        | +    | -     | +   | +    | +    | +   | +   | S                                       | I    | S    | I    | S    | I    | S    | R    | R    | S   | +    | 0.2 |  |           |
|                      | 0.98    | S        | +    | -     | +   | +    | +    | +   | +   | S                                       | S    | I    | R    | S    | I    | S    | R    | I    | S   | +    | 0.2 |  |           |
|                      | 1.03    | S        | +    | -     | +   | +    | +    | +   | +   | S                                       | I    | S    | R    | S    | I    | R    | R    | I    | S   | +    | 0.3 |  |           |
|                      | 1.12    | S        | +    | -     | +   | -    | +    | +   | +   | S                                       | I    | I    | R    | S    | I    | S    | R    | S    | S   | +    | 0.2 |  |           |
|                      | 0.5     | M        | +    | -     | +   | +    | +    | +   | +   | S                                       | I    | I    | R    | S    | I    | S    | R    | S    | S   | +    | 0.2 |  |           |
|                      | 1.21    | S        | +    | -     | +   | +    | +    | +   | +   | S                                       | R    | R    | R    | S    | R    | S    | R    | S    | S   | +    | 0.5 |  |           |
|                      | 1.14    | S        | +    | -     | +   | +    | +    | +   | +   | S                                       | R    | I    | R    | S    | I    | S    | R    | S    | S   | +    | 0.3 |  |           |
|                      | 0.69    | M        | +    | -     | +   | +    | +    | +   | +   | S                                       | I    | R    | R    | S    | I    | S    | R    | R    | S   | +    | 0.4 |  |           |
|                      | 0.62    | M        | +    | -     | +   | +    | +    | +   | +   | S                                       | R    | R    | S    | S    | I    | S    | R    | S    | S   | -    | 0.3 |  |           |
|                      | 1.19    | S        | +    | -     | +   | -    | +    | +   | +   | R                                       | I    | R    | S    | S    | I    | R    | R    | R    | S   | +    | 0.5 |  |           |
|                      | 0.79    | S        | +    | -     | +   | +    | +    | +   | +   | S                                       | I    | I    | S    | S    | S    | S    | R    | S    | S   | -    | 0.1 |  |           |
|                      | 0.79    | S        | +    | -     | +   | +    | +    | +   | +   | S                                       | I    | I    | R    | S    | I    | S    | R    | R    | S   | +    | 0.3 |  |           |
|                      | 1.23    | S        | +    | -     | +   | +    | +    | +   | +   | R                                       | R    | R    | R    | S    | R    | R    | R    | S    | S   | +    | 0.7 |  |           |
|                      | 1.09    | S        | +    | -     | +   | +    | +    | +   | +   | S                                       | R    | R    | R    | S    | I    | S    | R    | R    | S   | +    | 0.5 |  |           |
|                      | 3.35    | S        | +    | -     | +   | +    | +    | +   | +   | S                                       | I    | R    | R    | R    | S    | S    | S    | S    | S   | +    | 0.3 |  |           |
|                      | 0.99    | S        | +    | -     | +   | +    | +    | +   | +   | S                                       | R    | R    | R    | S    | R    | S    | R    | I    | S   | +    | 0.5 |  |           |
|                      | 1.08    | S        | +    | -     | +   | +    | +    | +   | +   | S                                       | I    | I    | I    | I    | I    | S    | R    | R    | S   | +    | 0.2 |  |           |
|                      | 0.69    | M        | -    | -     | +   | +    | +    | +   | +   | S                                       | I    | I    | S    | S    | I    | S    | R    | I    | S   | +    | 0.1 |  |           |
|                      | 1.65    | S        | +    | -     | +   | +    | +    | +   | +   | S                                       | I    | S    | R    | S    | S    | S    | R    | R    | S   | +    | 0.3 |  |           |
|                      | 1.33    | S        | +    | -     | +   | +    | +    | +   | +   | S                                       | I    | I    | R    | S    | R    | S    | R    | I    | S   | +    | 0.3 |  |           |
|                      | 1.19    | S        | +    | -     | +   | +    | +    | +   | +   | S                                       | I    | R    | R    | S    | I    | S    | R    | S    | S   | +    | 0.3 |  |           |
|                      | 0.92    | S        | -    | -     | +   | +    | +    | +   | +   | S                                       | I    | I    | S    | S    | S    | S    | R    | R    | S   | +    | 0.2 |  |           |
|                      | 1.02    | S        | -    | -     | +   | +    | +    | +   | +   | S                                       | I    | I    | S    | S    | I    | S    | R    | R    | S   | +    | 0.2 |  |           |
|                      | 1.26    | S        | +    | -     | +   | +    | +    | +   | +   | S                                       | I    | S    | I    | S    | I    | S    | R    | S    | S   | +    | 0.1 |  |           |
|                      | 0.84    | S        | +    | -     | +   | +    | +    | +   | +   | S                                       | I    | I    | I    | S    | I    | S    | R    | S    | S   | +    | 0.1 |  |           |
|                      | 0.48    | M        | -    | -     | +   | +    | +    | +   | +   | S                                       | R    | I    | R    | S    | R    | S    | R    | S    | S   | +    | 0.4 |  |           |
|                      | 0.66    | M        | +    | -     | +   | +    | +    | +   | +   | S                                       | R    | I    | R    | S    | R    | R    | R    | S    | S   | +    | 0.5 |  |           |
|                      | 0.97    | S        | +    | -     | +   | +    | +    | +   | +   | S                                       | R    | I    | R    | S    | R    | S    | R    | I    | S   | +    | 0.4 |  |           |
|                      | 0.97    | S        | -    | -     | +   | +    | +    | +   | +   | S                                       | R    | I    | R    | S    | R    | S    | R    | I    | S   | +    | 0.4 |  |           |
|                      | 1.02    | S        | -    | -     | +   | +    | +    | +   | +   | S                                       | R    | I    | R    | S    | R    | S    | R    | I    | S   | +    | 0.4 |  |           |
|                      | 1.05    | S        | +    | -     | +   | +    | +    | +   | +   | S                                       | I    | I    | R    | S    | R    | S    | R    | I    | S   | +    | 0.3 |  |           |
|                      | 1.02    | S        | +    | -     | +   | +    | +    | +   | +   | S                                       | I    | I    | R    | S    | R    | S    | R    | I    | S   | +    | 0.3 |  |           |
|                      | 1.04    | S        | -    | -     | +   | +    | +    | +   | +   | S                                       | I    | S    | R    | S    | I    | S    | R    | I    | S   | +    | 0.2 |  |           |
|                      | 1.12    | S        | +    | -     | +   | +    | +    | +   | +   | S                                       | I    | I    | I    | S    | I    | S    | R    | I    | S   | +    | 0.1 |  |           |
|                      | 0.73    | S        | +    | -     | +   | +    | +    | +   | +   | S                                       | I    | R    | I    | R    | I    | S    | R    | I    | S   | +    | 0.3 |  |           |
|                      | 1.18    | S        | -    | -     | +   | +    | +    | +   | +   | S                                       | I    | I    | I    | S    | I    | S    | R    | R    | S   | +    | 0.2 |  |           |
|                      | 0.93    | S        | -    | -     | +   | +    | +    | +   | +   | S                                       | R    | I    | R    | S    | R    | S    | R    | I    | S   | +    | 0.4 |  |           |
|                      | 1.01    | S        | +    | -     | +   | +    | +    | +   | +   | S                                       | R    | I    | R    | S    | R    | S    | R    | I    | S   | +    | 0.4 |  |           |
|                      | 1.02    | S        | +    | -     | +   | +    | +    | +   | +   | S                                       | I    | I    | R    | S    | R    | S    | R    | I    | S   | +    | 0.3 |  |           |
|                      | 0.69    | M        | +    | -     | +   | +    | +    | +   | +   | S                                       | R    | I    | R    | S    | R    | S    | R    | I    | S   | +    | 0.4 |  |           |
|                      | 1.02    | S        | -    | -     | +   | +    | +    | +   | +   | S                                       | R    | I    | R    | S    | R    | S    | R    | R    | S   | +    | 0.5 |  |           |
|                      | 1.21    | S        | +    | -     | +   | +    | +    | +   | +   | S                                       | R    | I    | R    | S    | R    | S    | R    | I    | S   | +    | 0.4 |  |           |
|                      | 1.27    | S        | -    | -     | +   | +    | +    | +   | +   | S                                       | R    | I    | R    | S    | R    | S    | R    | I    | S   | +    | 0.4 |  |           |
|                      | 0.63    | M        | +    | -     | +   | +    | +    | +   | +   | S                                       | R    | I    | I    | S    | R    | S    | R    | R    | S   | +    | 0.4 |  |           |
| Percent positive (%) |         |          | 77.1 | 0     | 100 | 95.8 | 100  | 100 | 100 | 6.3                                     | 37.5 | 20.8 | 68.8 | 4.2  | 41.7 | 8.3  | 97.9 | 33.3 | 0   | 98.8 |     |  |           |
| Percent negative (%) |         |          | 22.9 | 100   | 0   | 4.2  | 0    | 0   | 0   | 93.7                                    | 62.5 | 79.2 | 31.2 | 95.8 | 58.3 | 91.7 | 2.1  | 66.7 | 100 | 1.2  |     |  |           |

**Supplementary Table S3.** Result of biofilm assay, biofilm-associated gene screening, and AST for 48 isolates of *E. faecium*

| Species              | Biofilm |          |      | Genes |      |      |      |      |      | Antimicrobial Susceptibility Test (AST) |      |      |      |      |      |      |      |      |     |      |     | MAR index |
|----------------------|---------|----------|------|-------|------|------|------|------|------|-----------------------------------------|------|------|------|------|------|------|------|------|-----|------|-----|-----------|
|                      | O. D    | Quantity | agg  | efaA  | bop  | srt  | sprE | cob  | ccf  | AMP                                     | CIP  | DOX  | ERY  | LZD  | MIN  | PEN  | Q/D  | RIF  | VAN | MDR  |     |           |
| E. faecium           | 0.13    | W        | -    | -     | +    | +    | -    | -    | -    | S                                       | S    | S    | R    | I    | S    | S    | R    | R    | S   | +    | 0.3 |           |
|                      | 0.13    | W        | +    | -     | +    | +    | -    | -    | -    | S                                       | S    | S    | R    | I    | S    | S    | I    | R    | S   | +    | 0.2 |           |
|                      | 0.13    | W        | +    | -     | +    | +    | -    | -    | -    | S                                       | S    | S    | R    | I    | S    | S    | I    | R    | S   | +    | 0.2 |           |
|                      | 0.13    | W        | -    | -     | +    | +    | -    | +    | -    | S                                       | S    | S    | R    | I    | S    | S    | I    | R    | S   | +    | 0.2 |           |
|                      | 0.13    | W        | +    | -     | +    | +    | -    | -    | +    | S                                       | S    | S    | R    | S    | S    | S    | S    | R    | S   | -    | 0.2 |           |
|                      | 0.13    | W        | +    | -     | +    | +    | -    | +    | -    | S                                       | R    | R    | R    | S    | R    | S    | R    | S    | S   | +    | 0.5 |           |
|                      | 0.13    | W        | +    | -     | +    | +    | -    | -    | +    | S                                       | I    | R    | R    | S    | R    | S    | R    | I    | I   | +    | 0.4 |           |
|                      | 0.14    | W        | +    | -     | +    | -    | -    | +    | +    | S                                       | I    | R    | R    | S    | R    | S    | R    | I    | I   | +    | 0.4 |           |
|                      | 0.93    | S        | +    | -     | -    | +    | -    | -    | +    | S                                       | I    | R    | R    | R    | R    | S    | R    | R    | I   | +    | 0.6 |           |
|                      | 0.15    | W        | -    | -     | -    | +    | -    | -    | +    | S                                       | I    | R    | R    | I    | R    | S    | R    | I    | I   | +    | 0.4 |           |
|                      | 0.14    | W        | +    | -     | +    | +    | -    | +    | +    | R                                       | R    | S    | I    | S    | S    | R    | I    | S    | S   | +    | 0.3 |           |
|                      | 0.15    | W        | +    | -     | +    | +    | -    | -    | -    | S                                       | R    | S    | I    | I    | S    | S    | R    | R    | I   | +    | 0.3 |           |
|                      | 0.12    | W        | +    | -     | +    | +    | +    | +    | +    | R                                       | R    | S    | R    | R    | S    | R    | S    | S    | S   | +    | 0.5 |           |
|                      | 0.96    | S        | +    | -     | +    | +    | +    | +    | +    | S                                       | I    | S    | R    | I    | S    | S    | I    | S    | S   | +    | 0.1 |           |
|                      | 0.14    | W        | +    | -     | +    | +    | +    | +    | -    | S                                       | I    | S    | I    | R    | R    | S    | R    | R    | S   | +    | 0.4 |           |
|                      | 0.57    | S        | +    | -     | +    | +    | +    | +    | +    | S                                       | I    | S    | S    | S    | S    | S    | I    | S    | S   | -    | 0   |           |
|                      | 0.54    | S        | +    | -     | +    | +    | +    | +    | -    | S                                       | I    | S    | I    | R    | R    | S    | R    | I    | I   | +    | 0.3 |           |
|                      | 1.22    | S        | +    | -     | -    | +    | +    | +    | +    | S                                       | R    | S    | S    | S    | S    | S    | I    | S    | S   | -    | 0.1 |           |
|                      | 0.15    | W        | +    | -     | +    | +    | +    | +    | +    | R                                       | I    | S    | I    | I    | S    | R    | S    | R    | S   | +    | 0.3 |           |
|                      | 0.98    | S        | +    | -     | +    | +    | +    | +    | -    | R                                       | R    | R    | I    | R    | R    | R    | S    | S    | S   | +    | 0.6 |           |
|                      | 0.78    | S        | +    | -     | +    | +    | +    | +    | -    | S                                       | I    | S    | I    | R    | S    | S    | I    | S    | S   | +    | 0.1 |           |
|                      | 0.85    | S        | +    | -     | +    | +    | +    | +    | -    | S                                       | R    | S    | R    | R    | S    | S    | S    | R    | S   | +    | 0.4 |           |
|                      | 0.42    | M        | +    | -     | +    | +    | +    | +    | +    | S                                       | R    | R    | I    | R    | R    | S    | I    | R    | I   | +    | 0.5 |           |
|                      | 0.2     | W        | -    | -     | +    | +    | +    | +    | +    | S                                       | I    | R    | I    | R    | R    | S    | R    | I    | S   | +    | 0.4 |           |
|                      | 0.97    | S        | +    | -     | +    | +    | +    | +    | +    | S                                       | R    | S    | R    | R    | S    | S    | I    | I    | S   | +    | 0.3 |           |
|                      | 0.17    | W        | +    | -     | +    | +    | +    | +    | -    | S                                       | R    | S    | R    | R    | R    | I    | S    | R    | S   | +    | 0.4 |           |
|                      | 0.16    | W        | -    | -     | +    | +    | +    | +    | -    | S                                       | I    | R    | R    | R    | R    | R    | S    | I    | R   | +    | 0.5 |           |
|                      | 0.2     | W        | +    | -     | +    | -    | +    | +    | -    | S                                       | R    | I    | I    | R    | R    | S    | R    | R    | I   | +    | 0.5 |           |
|                      | 0.15    | W        | -    | -     | +    | +    | +    | +    | -    | S                                       | R    | R    | I    | R    | R    | S    | R    | R    | I   | +    | 0.6 |           |
|                      | 0.3     | M        | -    | -     | +    | +    | +    | +    | -    | S                                       | I    | S    | R    | R    | R    | S    | R    | R    | S   | +    | 0.4 |           |
|                      | 0.17    | N        | -    | -     | +    | +    | +    | +    | -    | S                                       | I    | S    | R    | R    | R    | S    | R    | R    | S   | +    | 0.4 |           |
|                      | 0.23    | W        | +    | -     | +    | +    | +    | +    | -    | S                                       | I    | S    | R    | R    | R    | S    | R    | R    | S   | +    | 0.4 |           |
|                      | 0.17    | N        | +    | -     | +    | +    | +    | +    | -    | S                                       | I    | R    | R    | R    | R    | R    | S    | R    | S   | +    | 0.5 |           |
|                      | 0.16    | N        | +    | -     | +    | +    | +    | +    | +    | S                                       | I    | S    | R    | R    | R    | S    | R    | R    | S   | +    | 0.4 |           |
|                      | 0.18    | N        | +    | -     | +    | +    | -    | -    | -    | S                                       | I    | S    | R    | R    | R    | S    | R    | R    | S   | +    | 0.4 |           |
|                      | 0.3     | W        | +    | -     | -    | +    | -    | -    | -    | S                                       | I    | S    | R    | R    | R    | S    | R    | R    | S   | +    | 0.4 |           |
| 0.31                 | W       | +        | -    | -     | -    | -    | -    | -    | S    | I                                       | S    | R    | R    | R    | S    | R    | R    | S    | +   | 0.4  |     |           |
| 0.17                 | N       | +        | -    | -     | +    | -    | -    | -    | S    | I                                       | S    | R    | S    | S    | S    | R    | R    | S    | +   | 0.3  |     |           |
| 0.17                 | N       | +        | -    | -     | +    | -    | -    | -    | S    | R                                       | R    | R    | R    | R    | R    | S    | R    | S    | +   | 0.6  |     |           |
| 0.13                 | N       | +        | -    | +     | +    | +    | +    | -    | S    | R                                       | S    | I    | I    | S    | S    | R    | R    | I    | +   | 0.3  |     |           |
| 0.16                 | N       | +        | -    | +     | -    | -    | -    | +    | S    | I                                       | R    | R    | I    | R    | S    | R    | S    | S    | +   | 0.4  |     |           |
| 0.17                 | N       | +        | -    | +     | +    | +    | +    | -    | R    | R                                       | S    | I    | I    | S    | R    | S    | S    | S    | +   | 0.3  |     |           |
| 0.31                 | W       | +        | -    | +     | +    | -    | -    | +    | S    | I                                       | I    | I    | I    | R    | R    | S    | S    | S    | +   | 0.2  |     |           |
| 0.73                 | M       | +        | -    | +     | +    | +    | +    | +    | S    | R                                       | R    | R    | R    | R    | R    | S    | S    | S    | +   | 0.6  |     |           |
| 1                    | S       | +        | -    | +     | +    | +    | +    | +    | S    | I                                       | R    | R    | R    | I    | R    | R    | S    | S    | +   | 0.4  |     |           |
| 0.88                 | S       | -        | -    | +     | +    | -    | -    | -    | S    | I                                       | S    | I    | I    | S    | S    | R    | S    | S    | +   | 0.1  |     |           |
| 1.04                 | S       | -        | -    | +     | +    | -    | -    | +    | S    | I                                       | S    | R    | R    | S    | R    | I    | S    | S    | +   | 0.3  |     |           |
| 0.18                 | N       | +        | -    | +     | +    | +    | +    | -    | S    | I                                       | S    | I    | I    | S    | S    | S    | S    | S    | +   | 0    |     |           |
| Percent positive (%) |         |          | 78.1 | 0     | 92.7 | 93.8 | 78.1 | 66.7 | 77.1 | 10.4                                    | 33.3 | 31.3 | 62.5 | 52.1 | 39.6 | 18.8 | 54.2 | 47.9 | 0   | 95.8 |     |           |
| Percent negative (%) |         |          | 21.9 | 100   | 7.3  | 6.3  | 21.9 | 33.3 | 22.9 | 89.6                                    | 66.7 | 68.7 | 37.5 | 47.9 | 60.4 | 81.2 | 45.8 | 52.1 | 100 | 4.2  |     |           |
